# Supplementary material for: Lifestyle Screening Tools for Children in the Community Setting: A Systematic Review
Source: MDPI journal article supplement (doi:10.3390/nu14142899), 2022-07-14
Supplement: s1 [file s1]

## Supplementary file S1: Search strategy

All searches were performed on July 27, 2020.

### Searches lifestyle tools

#### PubMed:

| Search | Search terms                                                                                                                                                                                                      | Number of hits |
|--------|-------------------------------------------------------------------------------------------------------------------------------------------------------------------------------------------------------------------|----------------|
| #1     | “child”[mh] OR “infant”[mh] OR “adolescent”[mh] OR<br>“pediatrics”[mh] OR child*[ti] OR infant*[ti] OR<br>adolescent*[ti] OR pediatric*[ti] OR paediatric*[ti] OR<br>toddler*[ti] OR preschool*[ti] OR youth*[ti] | 3,777,091      |
| #2     | “Surveys and Questionnaires”[mj] OR “Mass Screening”[mj]<br>OR screening[ti]                                                                                                                                      | 330,386        |
| #3     | “life style”[mj] OR lifestyle*[ti] OR life-style*[ti]                                                                                                                                                             | 45,048         |
| #4     | #1 AND #2 AND #3                                                                                                                                                                                                  | 552            |
| #5     | #1 AND #2 AND #3 Filters: Humans, Dutch, English, from<br>2004 - 2020                                                                                                                                             | 404            |

#### Cinahl:

| Search | Search terms                                                                                       | Number of hits |
|--------|----------------------------------------------------------------------------------------------------|----------------|
| #1     | MH “Child+” OR MH “Infant+” OR MH “Adolescence+”<br>OR MH “Pediatrics+” OR TI(child* OR infant* OR | 1,090,303      |

|    |                                                                                  |         |
|----|----------------------------------------------------------------------------------|---------|
|    | adolescent* OR pediatric* OR paediatric* OR toddler* OR preschool* OR youth*)    |         |
| #2 | MM “Questionnaires+” OR MM “Surveys+” OR MM “Health Screening+” OR TI(screening) | 97,764  |
| #3 | MM “Life Style+” OR TI(Lifestyle* OR Life-style*)                                | 122,915 |
| #4 | #1 AND #2 AND #3                                                                 | 540     |
| #5 | #1 AND #2 AND #3 Filters: Humans, from 2004-2020                                 | 372     |

#### Embase:

| Search | Search terms                                                                                                                                                                                     | Number of hits |
|--------|--------------------------------------------------------------------------------------------------------------------------------------------------------------------------------------------------|----------------|
| #1     | ‘child’/exp OR ‘infant’/exp OR ‘adolescent’/exp OR ‘pediatrics’/exp OR child*:ti OR infant*:ti OR adolescent*:ti OR pediatric*:ti OR paediatric*:ti OR toddler*:ti OR preschool*:ti OR youth*:ti | 4,022,363      |
| #2     | ‘questionnaire’/exp/mj OR ‘health survey’/exp/mj OR ‘survey’/exp/mj OR ‘screening’/exp/mj OR screening:ti                                                                                        | 377,246        |
| #3     | ‘lifestyle’/exp/mj OR lifestyle*:ti OR life-style*:ti                                                                                                                                            | 33,889         |
| #4     | #1 AND #2 AND #3                                                                                                                                                                                 | 176            |
| #5     | #1 AND #2 AND #3 Filters: Humans, Dutch, English, from 2004 - 2020                                                                                                                               | 123            |

## Updates Becker et al. [14]

### PubMed

| Search | Search terms                                                                                                                                                                                                                                                                                                                                                                                                                                                                                                                                                                                                                                                                                                                                                                                                                                                                                                                                                                                                                  | Number of hits |
|--------|-------------------------------------------------------------------------------------------------------------------------------------------------------------------------------------------------------------------------------------------------------------------------------------------------------------------------------------------------------------------------------------------------------------------------------------------------------------------------------------------------------------------------------------------------------------------------------------------------------------------------------------------------------------------------------------------------------------------------------------------------------------------------------------------------------------------------------------------------------------------------------------------------------------------------------------------------------------------------------------------------------------------------------|----------------|
| #1     | "nutritional risk"[Title/Abstract] OR "malnutrition risk"[Title/Abstract] OR "nutrient poor"[Title/Abstract] OR "dietary risk"[Title/Abstract] OR "child nutrition disorders/etiology"[MeSH Terms] OR "feeding and eating disorders of childhood/diagnosis"[MeSH Terms] OR "feeding and eating disorders of childhood/etiology"[MeSH Terms] OR "malnutrition/diagnosis"[MeSH Terms] OR "Nutrition Assessment"[MeSH Terms] OR "child nutrition disorders/diagnosis"[MeSH Terms] OR "Nutrition Assessment"[Title/Abstract] OR "nutrition diagnostic"[Title/Abstract] OR "nutrition diagnosis"[Title/Abstract] OR "nutrition screening"[Title/Abstract] OR "malnutrition assessment"[Title/Abstract] OR "malnutrition-inflammation score"[Title/Abstract] OR "Malnutrition/diagnosis"[Title/Abstract] OR "malnutrition diagnostic"[Title/Abstract] OR "malnutrition screening"[Title/Abstract] OR "nutritional assessment"[Title/Abstract] OR "nutritional diagnosis"[Title/Abstract] OR "nutritional screening"[Title/Abstract] | 36,983         |
| #2     | "Child"[MeSH Terms] OR "Adolescent"[MeSH Terms] OR "Pediatrics"[MeSH Terms] OR "Child"[Title/Abstract] OR                                                                                                                                                                                                                                                                                                                                                                                                                                                                                                                                                                                                                                                                                                                                                                                                                                                                                                                     | 3,737,556      |

|    |                                                                                                                                                                                                                                                                                                                                                                                                                                                                                           |           |
|----|-------------------------------------------------------------------------------------------------------------------------------------------------------------------------------------------------------------------------------------------------------------------------------------------------------------------------------------------------------------------------------------------------------------------------------------------------------------------------------------------|-----------|
|    | "children"[Title/Abstract] OR "Adolescent"[Title/Abstract] OR "adolescents"[Title/Abstract] OR "pediatric"[Title/Abstract] OR "paediatric"[Title/Abstract] OR "paediatrics"[Title/Abstract] OR "Pediatrics"[Title/Abstract] OR "infant"[Title/Abstract] OR "infants"[Title/Abstract]                                                                                                                                                                                                      |           |
| #3 | "reliability"[Title/Abstract] OR "sensitive"[Title/Abstract] OR "sensitivity"[Title/Abstract] OR "specific"[Title/Abstract] OR "specificity"[Title/Abstract] OR "validated"[Title/Abstract] OR "validation"[Title/Abstract] OR "validity"[Title/Abstract] OR "Sensitivity and Specificity"[MeSH Terms] OR "Reproducibility of Results"[MeSH Terms] OR "Reference Values"[MeSH Terms] OR "overall agreement"[Title/Abstract] OR "detected"[Title/Abstract] OR "correlated"[Title/Abstract] | 6,062,749 |
| #4 | #1 AND #2 AND #3 NOT (animals[mh] NOT humans[mh]) AND English[la] AND 2017/01/01:2020/07/27[pdat]                                                                                                                                                                                                                                                                                                                                                                                         | 558       |

## Cinahl

| Search | Search terms                                                                                                                                                                               | Number of hits |
|--------|--------------------------------------------------------------------------------------------------------------------------------------------------------------------------------------------|----------------|
| #1     | MH "Child Nutrition Disorders+" OR MH "Infant Nutrition Disorders/DI/ET" OR MH "Feeding and Eating Disorders of Childhood/DI/ET" OR MH "Malnutrition/DI/ET" OR MH "Nutritional Assessment" | 18,495         |
| #2     | TI ((nutrition* or malnutrition or dietary) n1 (risk* or diagnos* or screen* or assessment*))                                                                                              | 3,252          |

|     |                                                                                                                                           |         |
|-----|-------------------------------------------------------------------------------------------------------------------------------------------|---------|
| #3  | TI (Nutrient* n1 poor)                                                                                                                    | 28      |
| #4  | TI “malnutrition-inflammation score”                                                                                                      | 23      |
| #5  | AB ((nutrition* or malnutrition or dietary) n1 (risk* or diagnos* or screen* or assessment*))                                             | 7,003   |
| #6  | AB (Nutrient* n1 poor)                                                                                                                    | 278     |
| #7  | AB “malnutrition-inflammation score”                                                                                                      | 75      |
| #8  | MH "Child+" OR MH "Infant+"                                                                                                               | 670,219 |
| #9  | TI (Child* OR adolescen* OR pediatric* OR paediatric* OR infant*)                                                                         | 467,626 |
| #10 | AB (Child* OR adolescen* OR pediatric* OR paediatric* OR infant*)                                                                         | 509,052 |
| #11 | MH "Reference Values" OR MH "Reproducibility of Results" OR MH "External Validity" OR MH "Reliability+" OR MH "Reliability and Validity+" | 308,452 |
| #12 | TI (reliability OR sensitive OR sensitivity OR specific OR specificity OR validated OR validation OR validity)                            | 99,472  |
| #13 | AB (reliability OR sensitive OR sensitivity OR specific OR specificity OR validated OR validation OR validity)                            | 546,007 |
| #14 | #1 OR #2 OR #3 OR #4 OR #5 OR #6 OR #7                                                                                                    | 23,730  |
| #15 | #8 OR #9 OR #10                                                                                                                           | 953,415 |
| #16 | #11 OR #12 OR #13                                                                                                                         | 772,646 |

|     |                                                         |     |
|-----|---------------------------------------------------------|-----|
| #17 | #14 AND #15 AND #16 Filter: published between 2017-2020 | 381 |
|-----|---------------------------------------------------------|-----|

## Embase

| Search | Search terms                                                                                                                                                    | Number of hits |
|--------|-----------------------------------------------------------------------------------------------------------------------------------------------------------------|----------------|
| #1     | 'child'/exp OR 'adolescent'/exp OR 'infant'/exp                                                                                                                 | 3,724,335      |
| #2     | child*:ti,ab OR adolescen*:ti,ab OR pediatric*:ti,ab OR paediatric*:ti,ab<br>OR infant*:ti,ab                                                                   | 2,568,360      |
| #3     | 'sensitivity and specificity'/exp OR 'reproducibility'/exp OR 'reference value'/exp OR 'validity'/exp OR 'reliability'/exp                                      | 876,173        |
| #4     | reliability:ti,ab OR sensitive:ti,ab OR sensitivity:ti,ab OR specific:ti,ab<br>OR specificity:ti,ab OR validated:ti,ab OR validation:ti,ab OR<br>validity:ti,ab | 5,340,083      |
| #5     | ((nutrition* OR malnutrition OR dietary) NEAR/1 (risk* OR diagnos* OR<br>screen* OR assessment*)):ti,ab                                                         | 18,600         |
| #6     | (nutrient* NEAR/1 poor):ti,ab                                                                                                                                   | 1,769          |
| #7     | 'malnutrition-inflammation score':ti,ab                                                                                                                         | 325            |
| #8     | 'nutritional assessment'/exp                                                                                                                                    | 30,493         |
| #9     | 'nutritional status'/exp                                                                                                                                        | 67,730         |
| #10    | #1 OR #2                                                                                                                                                        | 4,411,762      |
| #11    | #3 OR #4                                                                                                                                                        | 5,691,695      |

|     |                                          |        |
|-----|------------------------------------------|--------|
| #12 | #5 OR #6 OR #7 OR #8 OR #9               | 98,617 |
| #13 | #10 AND #11 AND #12                      | 5,197  |
| #14 | #13 AND [English]/lim AND [2017-2020]/py | 1,425  |

### Update exploratory systematic search

#### PubMed

| Search | Search terms                                                                                                                                                                                                                                                                                                                                                                                                                                                     | Number of hits |
|--------|------------------------------------------------------------------------------------------------------------------------------------------------------------------------------------------------------------------------------------------------------------------------------------------------------------------------------------------------------------------------------------------------------------------------------------------------------------------|----------------|
| #1     | “infant”[mh] OR “child”[mh] OR “adolescent”[mh] OR infant[tiab] OR infants[tiab] OR infanthood[tiab] OR preschool[tiab] OR preschooler[tiab] OR toddler[tiab] OR toddlers[tiab] OR toddlerhood[tiab] OR child[tiab] OR children[tiab] OR childhood[tiab] OR adolescent[tiab] OR adolescents[tiab] OR adolescent[tiab] OR adolescents[tiab] OR adolescence[tiab] OR teen[tiab] OR teens[tiab] OR teenager[tiab] OR teenagers[tiab] OR youth[tiab] OR youths[tiab] | 4,003,592      |
| #2     | “malnutrition”[mh:noexp] OR “overnutrition”[mh:noexp] OR malnutrition[tiab] OR malnourished[tiab] OR malnourishment[tiab] OR malnutrition risk[tiab] OR undernutrition[tiab] OR overnutrition[tiab] OR dietary imbalance[tiab] OR dietary imbalances[tiab] OR nutrition imbalance[tiab] OR nutritional imbalance[tiab] OR nutrition imbalances[tiab] OR nutritional imbalances[tiab] OR nutrition risk[tiab] OR nutritional risk[tiab]                           | 58,551         |

|    |                                                                                                                                                                                                                                                                                                                                                                                                                                                                                                              |         |
|----|--------------------------------------------------------------------------------------------------------------------------------------------------------------------------------------------------------------------------------------------------------------------------------------------------------------------------------------------------------------------------------------------------------------------------------------------------------------------------------------------------------------|---------|
| #3 | “mass screening”[mh:noexp] OR “nutrition assessment”[mh] OR screening tool[tiab] OR screening tools[tiab] OR screening instrument[tiab] OR screening instruments[tiab] OR nutrition questionnaire[tiab] OR nutritional questionnaire[tiab] OR nutrition screening[tiab] OR nutritional screening[tiab] OR nutrition risk screening[tiab] OR nutritional risk screening[tiab] OR malnutrition risk screening [tiab] OR nutrition assessment[tiab] OR nutritional assessment[tiab] OR dietary assessment[tiab] | 145,375 |
| #4 | #1 AND #2 AND #3 AND 2019/01/01:2020/07/27[pdat] Filters: Dutch, English, Humans                                                                                                                                                                                                                                                                                                                                                                                                                             | 80      |
